# Supplementary material
Source: PubMed Central journal article supplement (PMC2206136)
Supplement: 7601955s1.pdf [file 7601955s1.pdf]

## Supplementary Figure 1

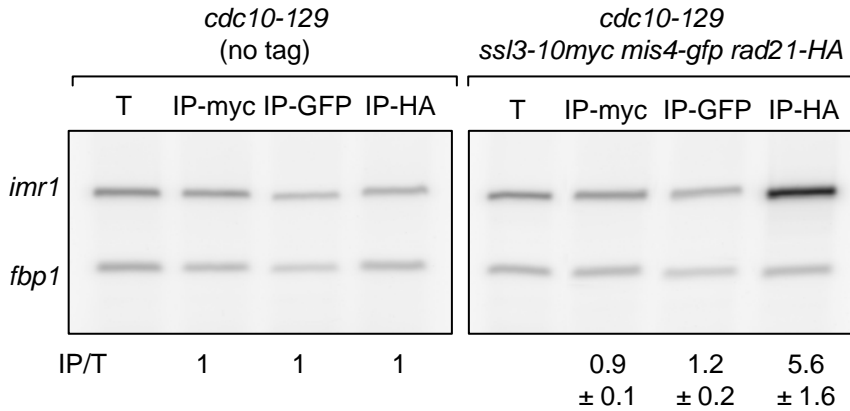

### **Ssl3 and Mis4 do not co-immunoprecipitate cohesin-bound *cen1* sub-domains**

The association of Ssl3-Myc, Mis4-GFP and Rad21-HA with *cen1* (*imr1*) was determined by ChIP in cells arrested in late G1 at 36°C by the *cdc10-129* mutation.

Total extract (T) was divided into three equivalent aliquots subjected to immunoprecipitation (IP) with either 9E10 (anti-Myc) A11122 (anti-GFP) or 12CA5 (anti-HA) antibodies. Enrichment of *imr1* (upper band) over the *fbp1* gene (lower band) was assayed by multiplex PCR. Enrichment (IP/T): the ratio *imr1* versus *fbp1* of the IP divided by the corresponding ratio of the Total extract.
