# Supplementary material
Source: PubMed Central journal article supplement (PMC2206136)
Supplement: 7601955s5.pdf [file 7601955s5.pdf]

## Supplementary Figure 5

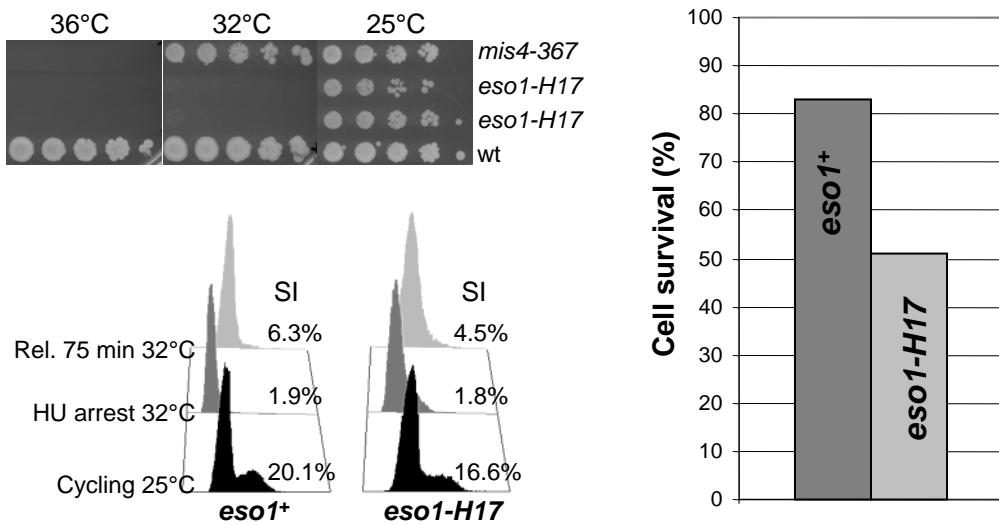

### Eso1 function is compromised in *eso1-H17* cells at 32°C

Serial dilutions of cells were spotted on agar plates and incubated at the indicated temperatures. Note that *mis4-367* but not *eso1-H17* cells can form colonies at 32°C. To estimate the extent of Eso1 inactivation within a single cell cycle, HU was added to *eso1-H17* and *eso1+* cycling cells at 25°C and shifted to 32°C to induce early S phase arrest (HU arrest 32°C). HU was washed away and cells incubated for 75 minutes at 32°C to allow the completion of DNA replication (Rel. 75 min 32°C). Cell survival was determined at that time by plating cells at 25°C. SI: septation index.
